# Supplementary material for: Integrating Clinical Phenotype and Gene Expression Data to Prioritize Novel Drug Uses
Source: PubMed Central journal article supplement — CPT Pharmacometrics Syst Pharmacol. 2016 Nov 14;5(11):599–607. doi: 10.1002/psp4.12108 (PMC5192994; doi:10.1002/psp4.12108), 2016-11-14
Supplement: PSP4-5-599-s002.pdf [file PSP4-5-599-s002.pdf]

**A.**

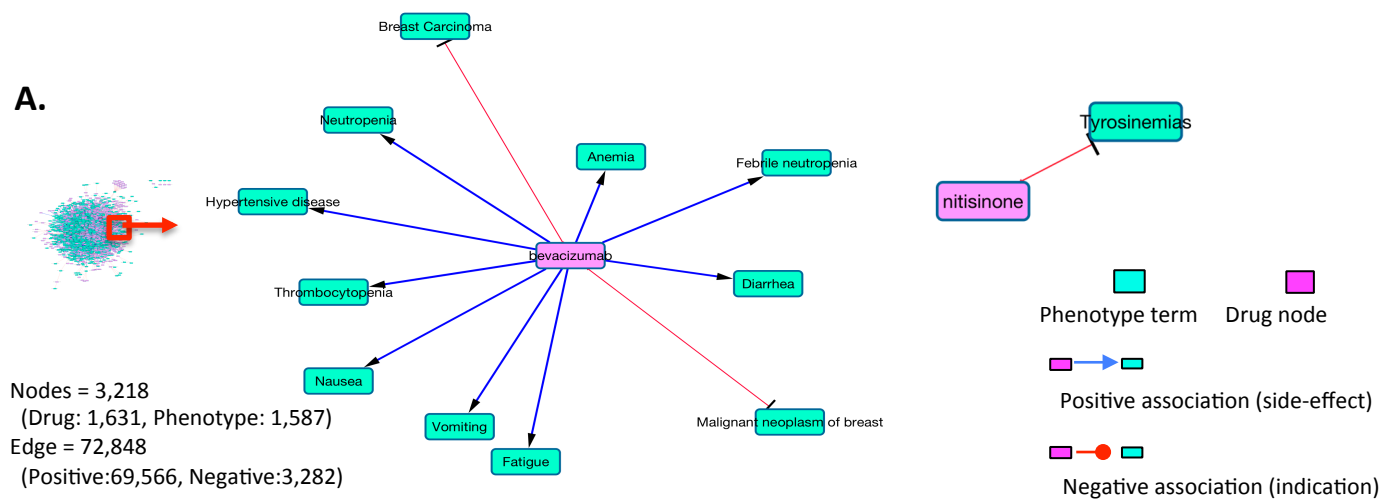

**B.**

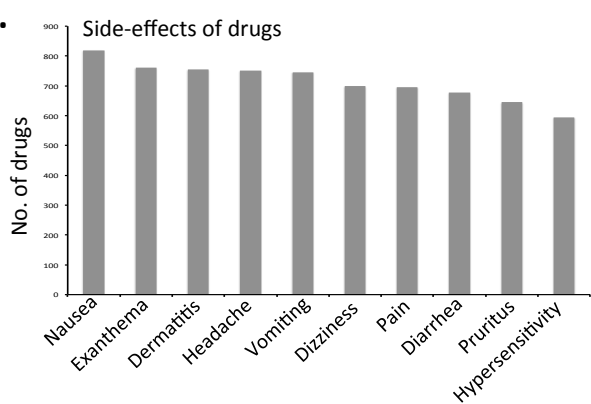

**C.**

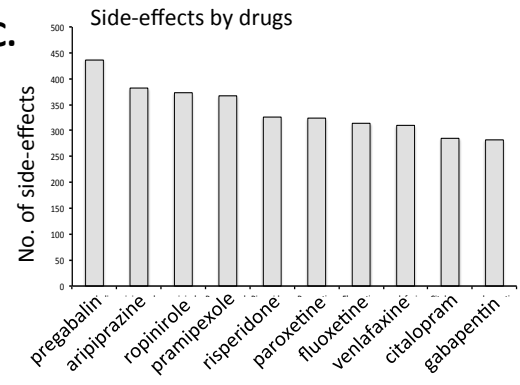

Supplemental figure 1. Distribution of phenotype and gene signatures for drugs.

**A.** Drug and associated hybrid phenotypes, such as side-effects and therapeutic effects (indications). This directional network consists of two types of nodes (drugs and phenotypes), and directional edges for positive (side-effect) and negative (therapeutic effect) associations between drugs and phenotypes. Cyan: phenotypes; pink: drugs. Edge directionality is denoted by distinct color and shapes. **B-C.** B. Phenotype distribution for each drug. The overall distribution of phenotypic terms, including side-effects and indications, was power-law like. The side-effects associated with the largest number of drugs were nausea, dermatitis, and headache. C. Highly ranked drugs with many side-effects. The drugs with the most diverse side-effects were in the psychiatric and neurodegeneration categories (schizophrenia, epilepsy, and Parkinsonism).

**D.**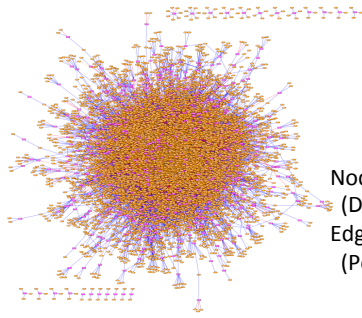

Nodes = 8,860  
 (Drug: 759, Gene: 8101)  
 Edge = 17,022  
 (Positive:10,433, Negative:6,589)

Gene Drug node

Positive association in MCF7 (FDR\* < 0.1)  
 (z-score of gene expression in a drug treated MCF7 > 0)

Negative association in MCF7 (FDR\* < 0.1)  
 (z-score of gene expression in a drug treated MCF7 < 0)

**E.**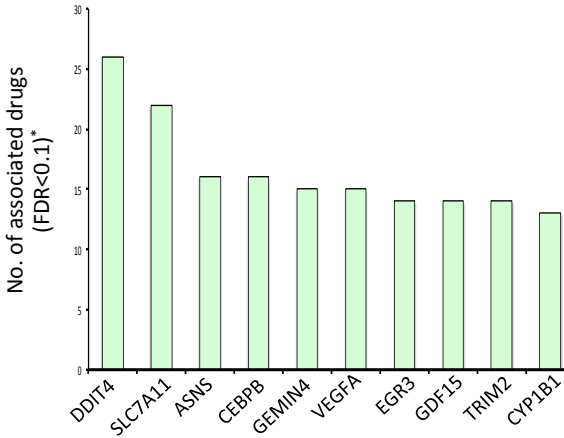

\* t-test

**F.**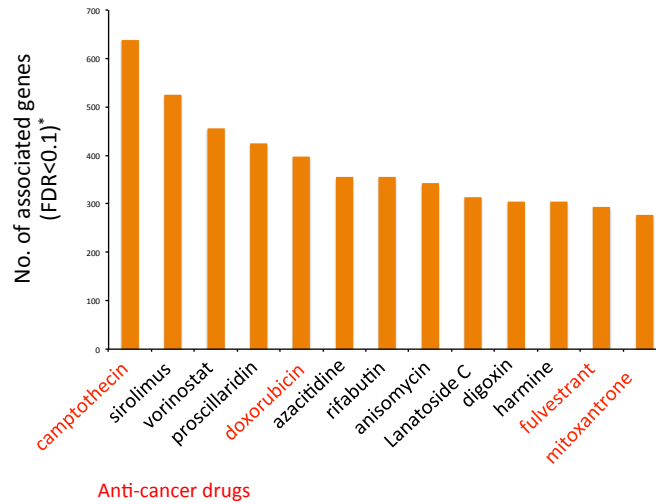

Supplemental figure 1. Distribution of phenotype and gene signatures for drugs.

**D.** Bipartite directional network of drug-gene signatures based on drug treated expression profiles of MCF7 cells in the Connectivity map. Orange nodes: gene signatures; pink nodes: treated drugs. Red and arrow-ended edges: positive associations between drug and gene signatures (FDR of t-test < 0.1 and gene expression z-score > 0). Blue and blunt-ended edges: negative associations (FDR of t-test < 0.1 and gene expression z-score < 0). **E-F.** Sample distributions between drugs and associated genes. **E.** Analyzed gene signatures and associated drugs displayed n-by-n relationships within scale-free network. Anti-cancer drugs, such as camptothecin and doxorubicin, had larger numbers of associated gene signatures in MCF7 cells. **F.** Known anti-cancer drugs. As in **E**, the overall distribution for the number of associated genes for each drug was power-law like.

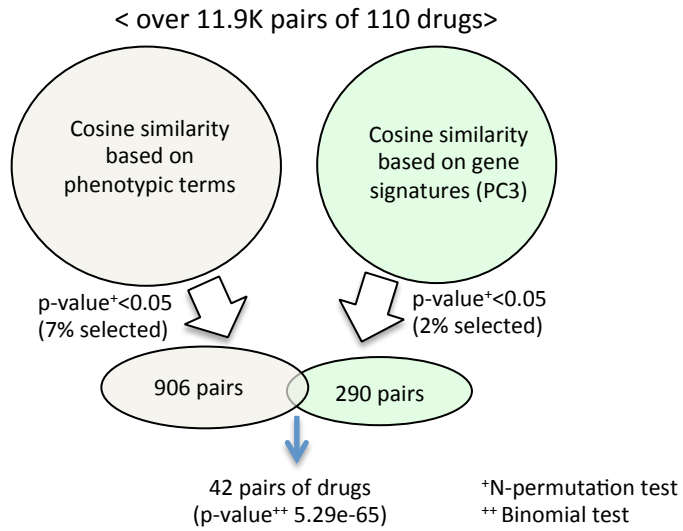

Supplemental figure 2. Selection of similar drugs based on gene signatures in PC3 and phenotypic terms
